# Supplementary material for: Efficacy and safety of gene therapy with onasemnogene abeparvovec in children with spinal muscular atrophy in the D-A-CH-region: a population-based observational study
Source: PubMed Central journal article supplement (PMC11492610; doi:10.1016/j.lanepe.2024.101092), 2024-10-07
Supplement: mmc1.pdf [file mmc1.pdf]

## Supplementary Material

### Real-world efficacy of onasemnogene abeparvovec in spinal muscular atrophy

#### Methods

##### Outcome measurements

In the event of a patient's death, the center completed an end of data collection form with the date and cause of the death. Information on the need for ventilation including the start and end dates as well as the type of ventilation (invasive versus non-invasive), frequency (daily use, occasional use or use only when ill), and time of use (nighttime, intermittent day time and continuous nighttime, continuous or intermittent during acute illness) was collected at each visit. To assess the nutritional status, use of a gastric or nasal feeding tube (supplemental or exclusive) was documented with start and end dates as well as any difficulties with swallowing or chewing.

Motor function was assessed by centrally trained physiotherapists. The appropriate motor function assessment tool was selected according to age and motor skills. The Children's Hospital of Philadelphia Infant Test of Neuromuscular Disorders (CHOP INTEND; maximum score 64) was administered to all children <2 years of age as well as in those >2 years without ability to sit (non-sitters). The Hammersmith Functional Motor Scale-Expanded (HFMSE; maximum score 66) was additionally assessed in patients >2 years of age and when the CHOP INTEND score was between 50 and 60. If the CHOP INTEND score was greater than 60, assessment was switched to the HFMSE in all patients. Revised Upper Limb Module (RULM; maximum score 37) was recommended in patients >2 years with ability to sit in wheelchair. The 6-minute walk test (6MWT) was performed in patients >3 years of age and able to walk independently. Because repeated 6MWT was available for only seven patients at time of data cut, this test was not included in the statistical analysis.

Motor milestones were assessed using section 2 of the Hammersmith Infant Neurological Examination (HINE) which evaluates a set of eight motor milestones: head control, sitting, voluntary grasp, ability to kick, rolling, crawling or bottom shuffling, standing and walking. Special attention was paid to the milestones of sitting, standing and walking. These milestones were counted as achieved, if either stable sitting, independent standing or independent walking were possible.

Figures

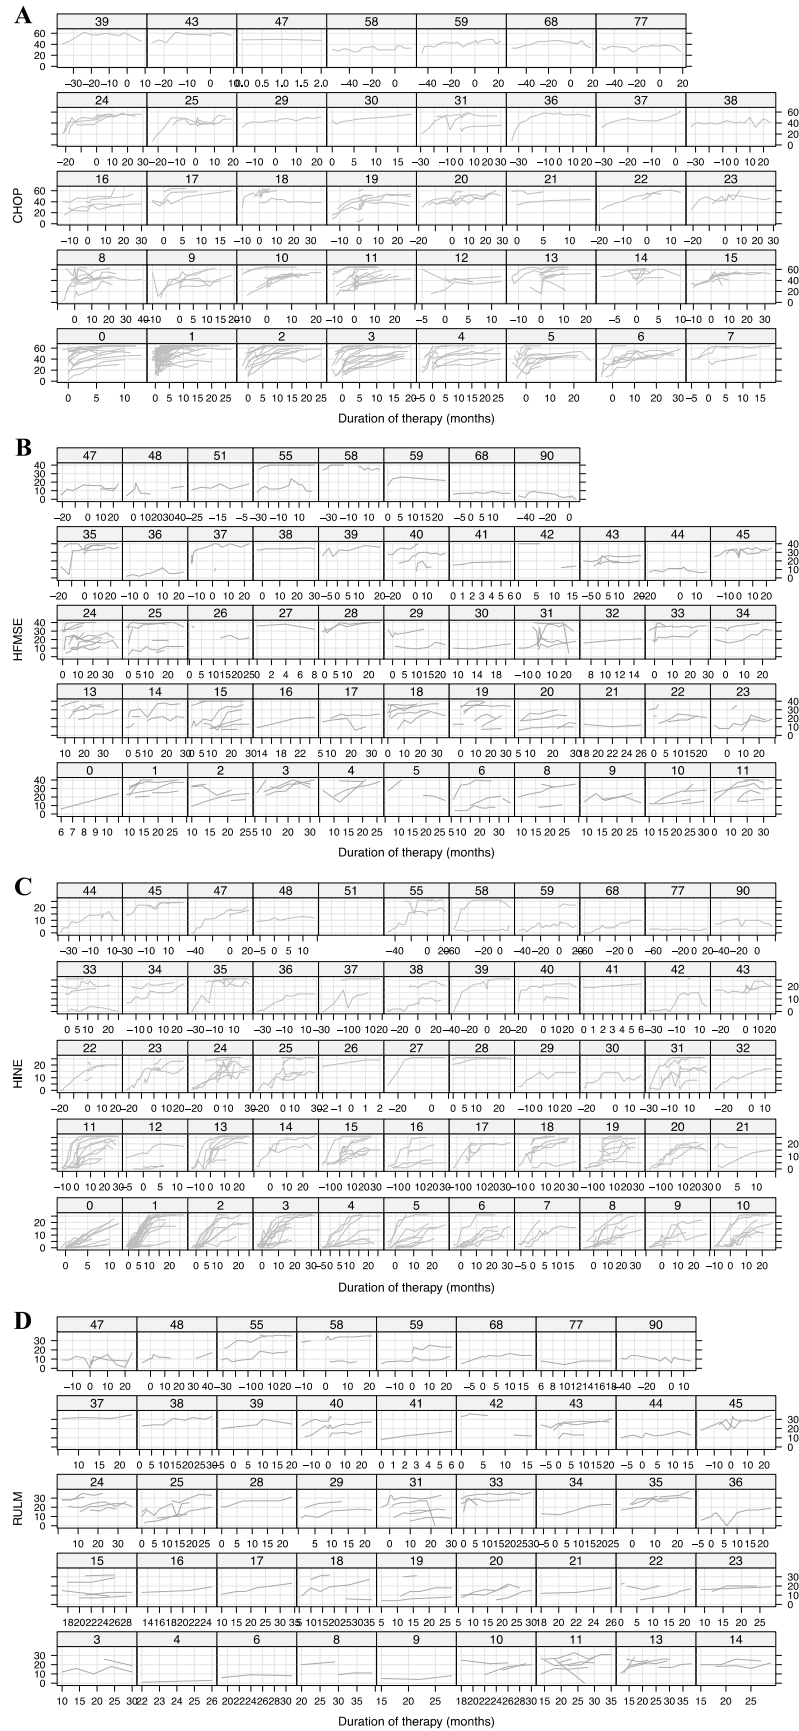

**Supplementary Figure 1: Individual CHOP INTEND, HFMSE, HINE and RULM courses.** Shown are the individual courses over the observation period in months of (A) CHOP INTEND, (B) HFMSE, (C) HINE and (D) RULM courses. Each panel depicts an age cohort in months at the time of GAT.

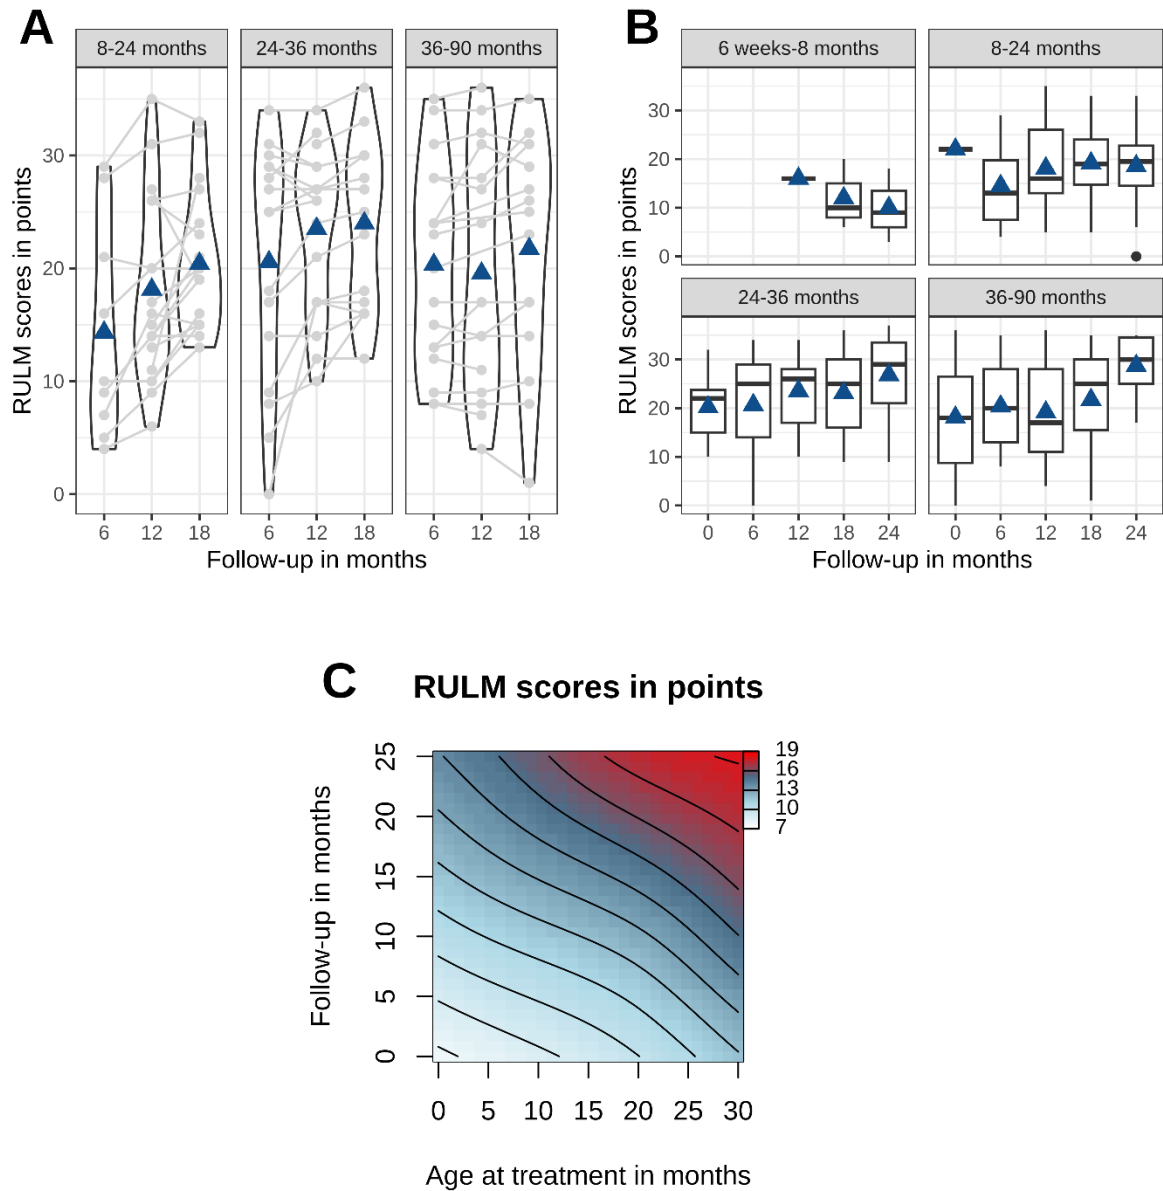

**Supplementary Figure 2: RULM scores before and after GAT.** RULM scores also increased 6 and 12 months after GAT; however, due to small sample size and test, no statistical analysis was performed. (A) Light gray lines depict individual courses, width of figures the number of patients represented and triangles mean values.

CHOP INTEND change from baseline to 6 and 12 months after gene therapy

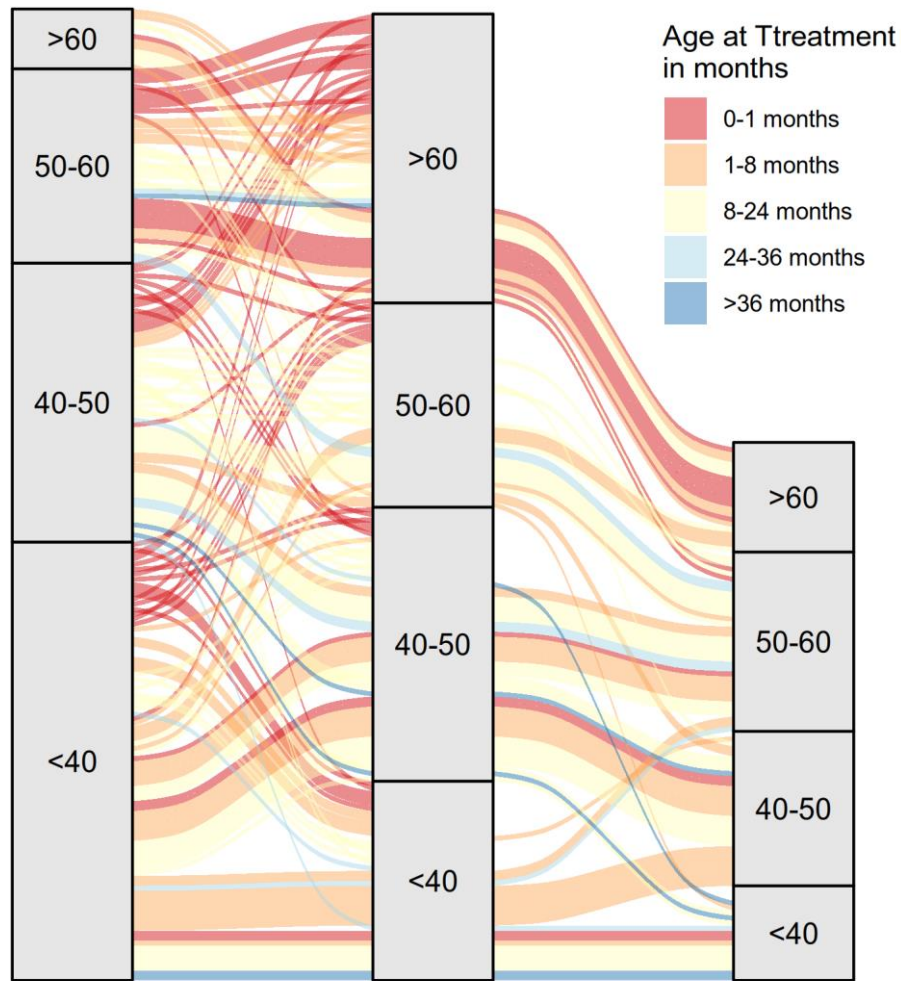

**Supplementary Figure 3: Sankey diagram of CHOP INTEND scores at baseline, 6 months and 12 months after treatment.** Shown are the individual courses of all patients with more than 2 CHOP INTEND score measurements at baseline, 6 months and 12 months after GAT. The columns represent CHOP INTEND categories < 40 between 40-50, between 50-60 and > 60 CHOP INTEND points.

CHOP INTEND change from baseline to 6 and 12 months after gene therapy

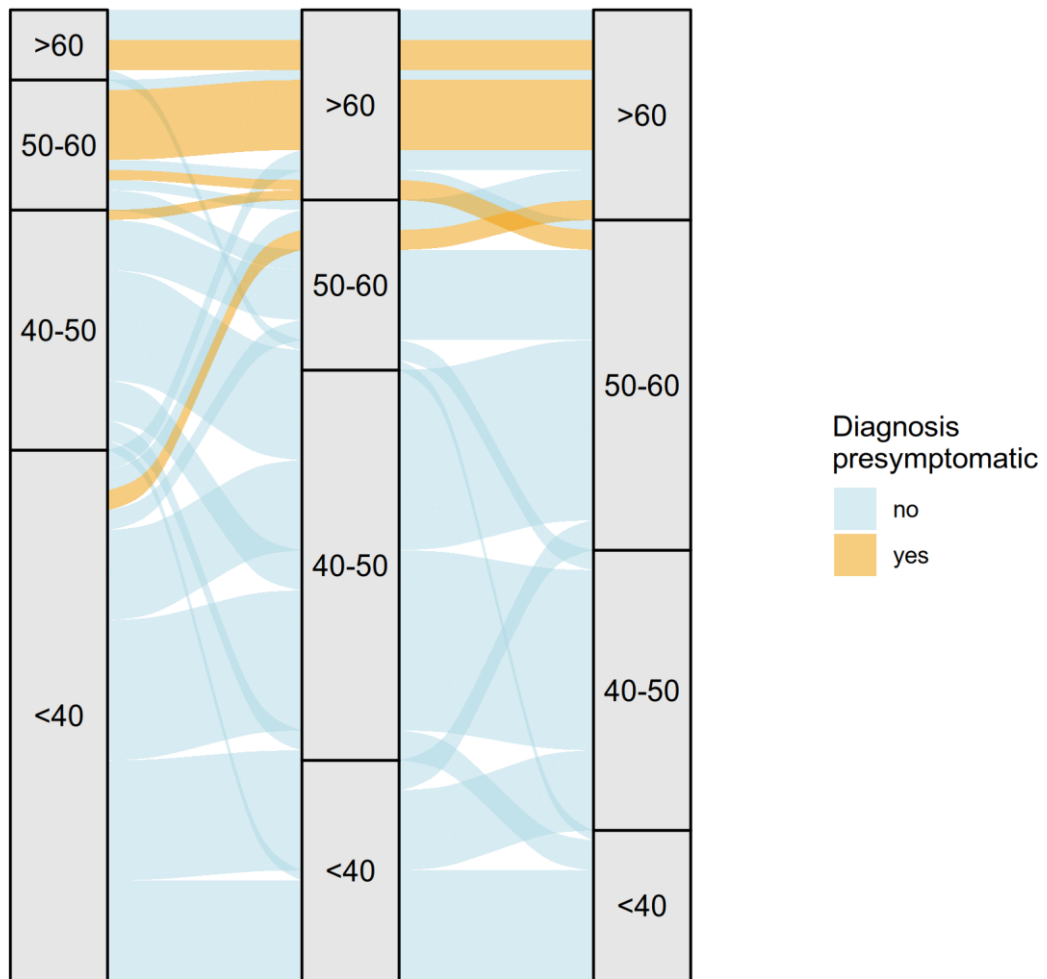

**Supplementary Figure 4: Sankey diagram of CHOP INTEND scores treated pre-symptomatically and symptomatically at baseline, 6 months and 12 months after treatment.** Shown are the individual courses of all patients identified with newborn screening with more than 2 CHOP INTEND score measurements at baseline, 6 months and 12 months after GAT. The columns represent CHOP INTEND categories < 40 between 40-50, between 50-60 and > 60 CHOP INTEND points.

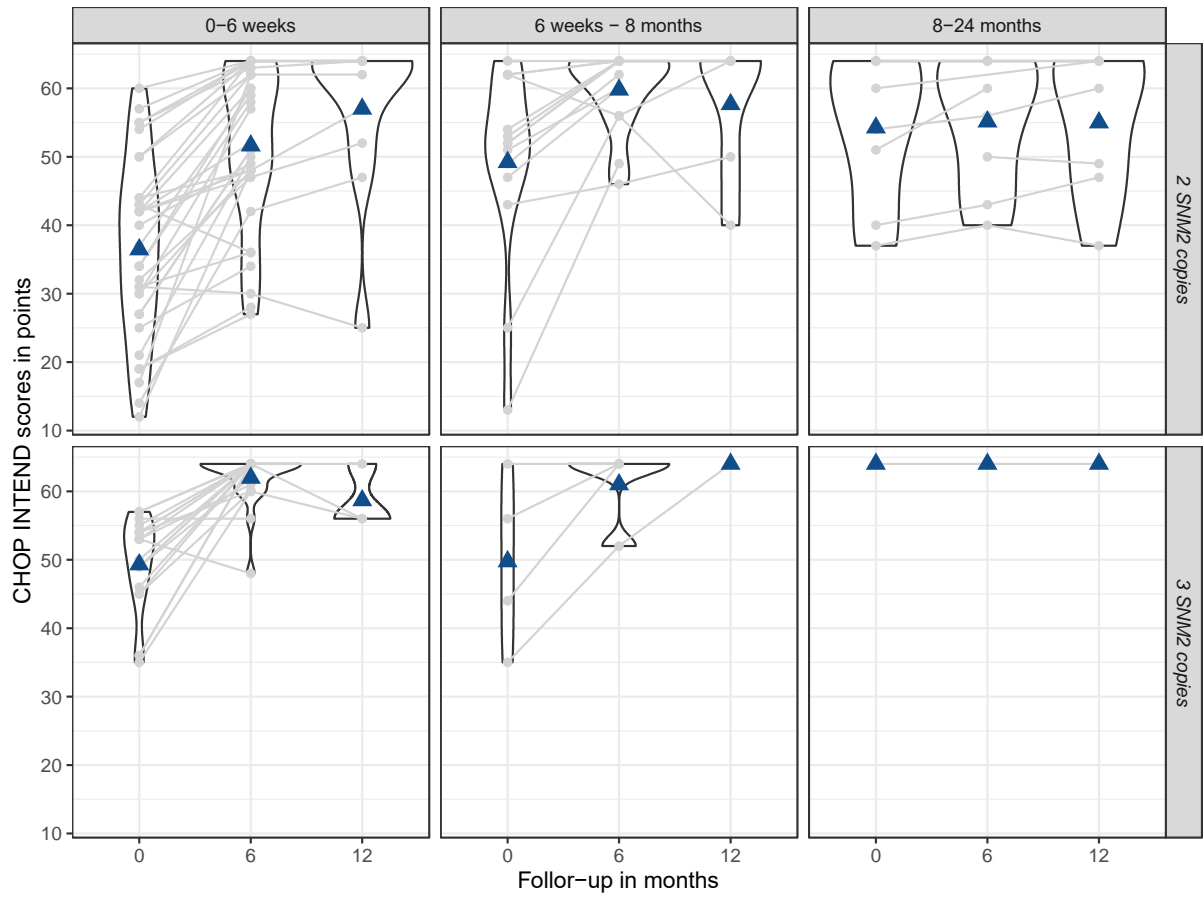

**Supplementary Figure 5: Violinplot of patients identified with newborn screening.** Shown are the CHOP INTEND scores at baseline (0) 6 and 12 months after GAT. The cohort is divided the different age-groups as well as 2 *SMN2* copy numbers (upper panels) and 3 *SMN2* copy numbers (lower panel). Patients identified with newborn screening with 3 *SMN2* copies. In patients > 8 months at GAT all but one patient received nusinersen before GAT.

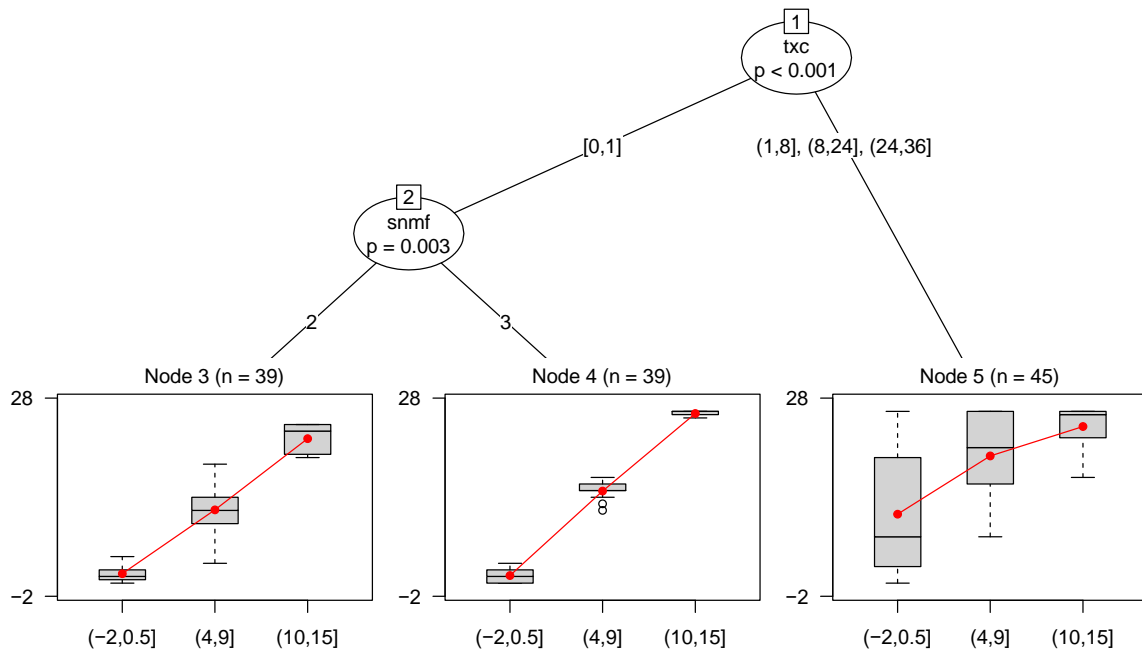

**Supplementary Figure 6: Tree diagram of HINE scores in points of presymptomatic patients.** Shown are boxplots of the HINE scores in points of pre-symptomatic patients in Note 4 to 7. Patients with a treatment in the age groups 0-6 weeks and 6 weeks to 8 months have a significantly higher HINE scores increase than those > 8 months (txc=age at treatment in months) in 1. Patients with a symptomatic diagnosis between 0-6 weeks have a significantly higher HINE scores increase than those between 6 weeks and 8 months in 2. Patients with a treatment between 0-6 weeks and with an *SMN2* copy number of 3 have a significantly higher HINE scores increase than those with 2 (snmf=*SMN2* copy number) in 3.

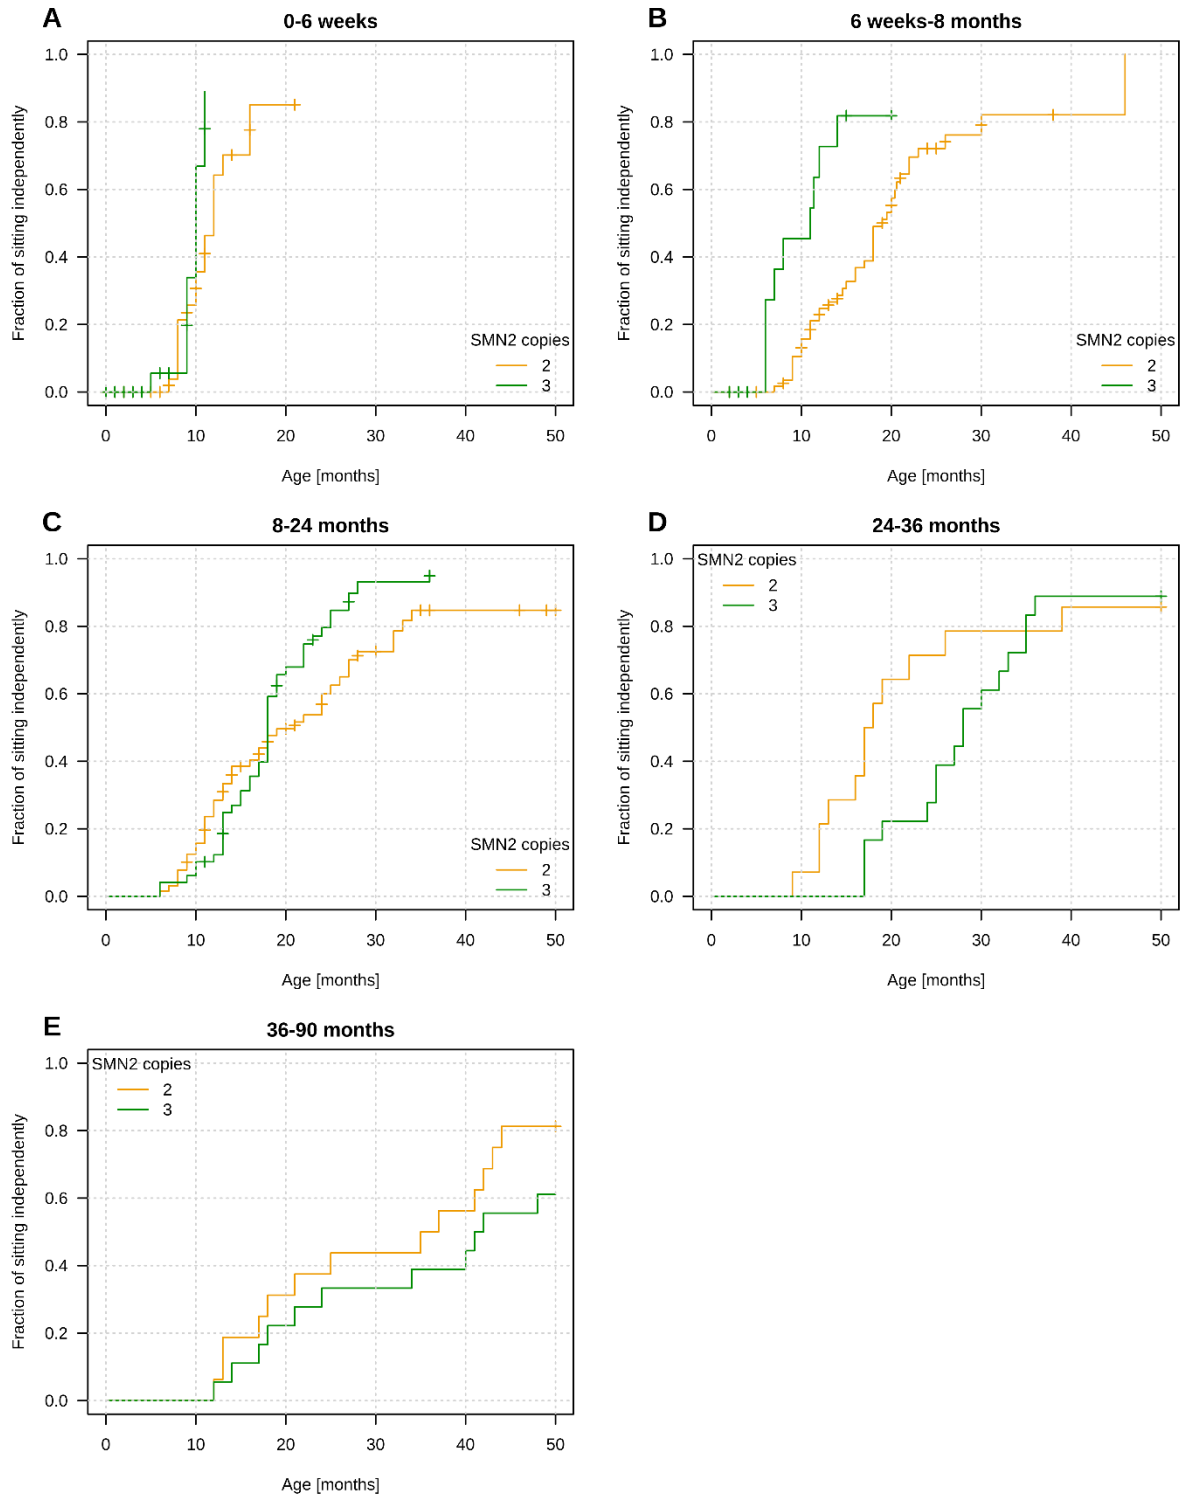

**Supplementary Figure 7:** Kaplan Meyer graph of patients reaching the milestone sitting, standing and walking depending on age groups at time of GAT and the SMN2 copy number. The graphs show a Kaplan Meyer analysis of patients with 2 (green) and three (orange) SMN2 copies in the different age groups (A)  $\leq 6$  weeks and (B) 6 weeks-8 months, (C) 8-24 months, (D) 24-36 months and (E)  $>36$  months.



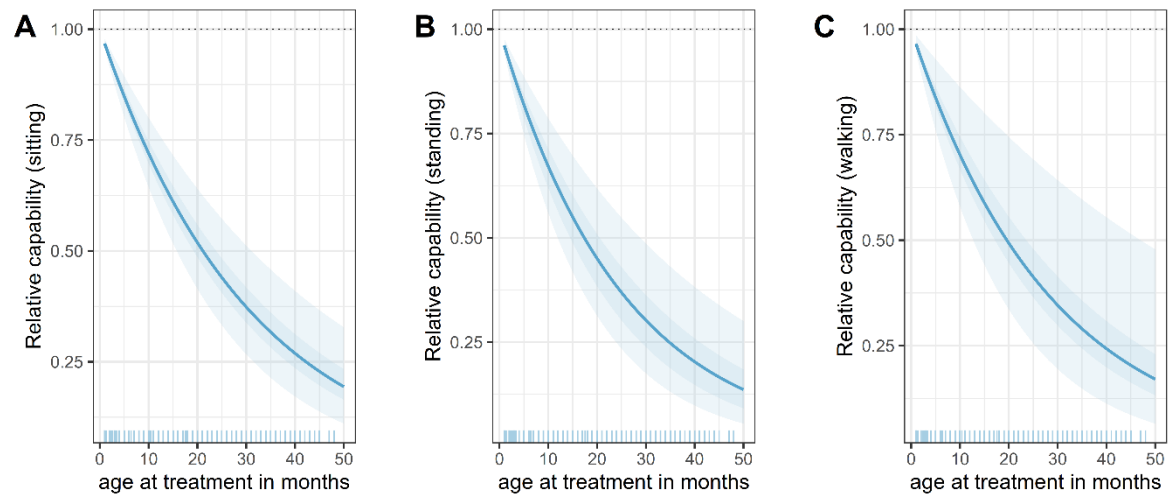

**Supplementary Figure 8: Relative capacity of reaching the milestone (D) sitting, (E) standing and (F) walking estimated from Cox proportional hazard regression. The graphs show in a COX-model, that the older the patients are at GAT the less patients gain the milestone sitting, walking and standing ( $p < 0.001$ ).**

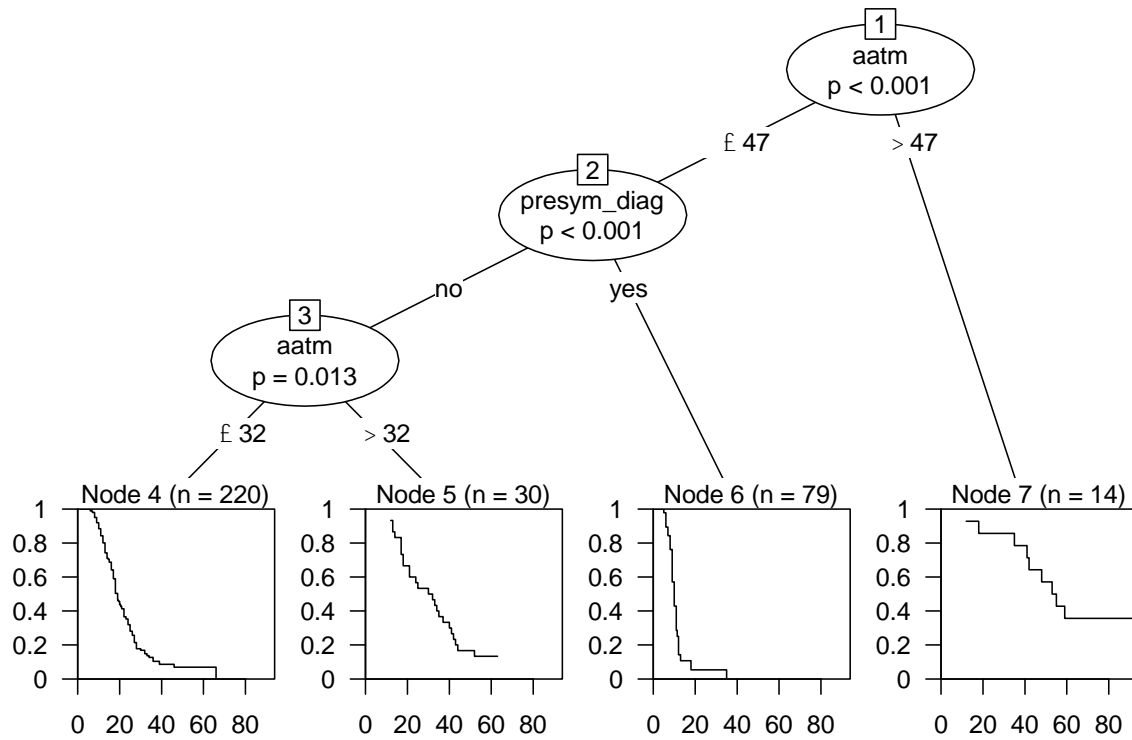

**Supplementary Figure 9: Tree of patients reaching the milestone sitting.** Shown are courses of patients reaching the milestone “sitting” in Note 3 to 7. Patients with a treatment > 47 months are significantly less frequently reaching the milestone (aatm=age at treatment in months) in 1. Patients with a symptomatic diagnosis significantly less frequently reaching the milestone (presym\_diag=presymptomatic diagnosis) in 2. Patients with a treatment > 1 months are significantly less frequently reaching the milestone (aatm=age at treatment in months) in 3

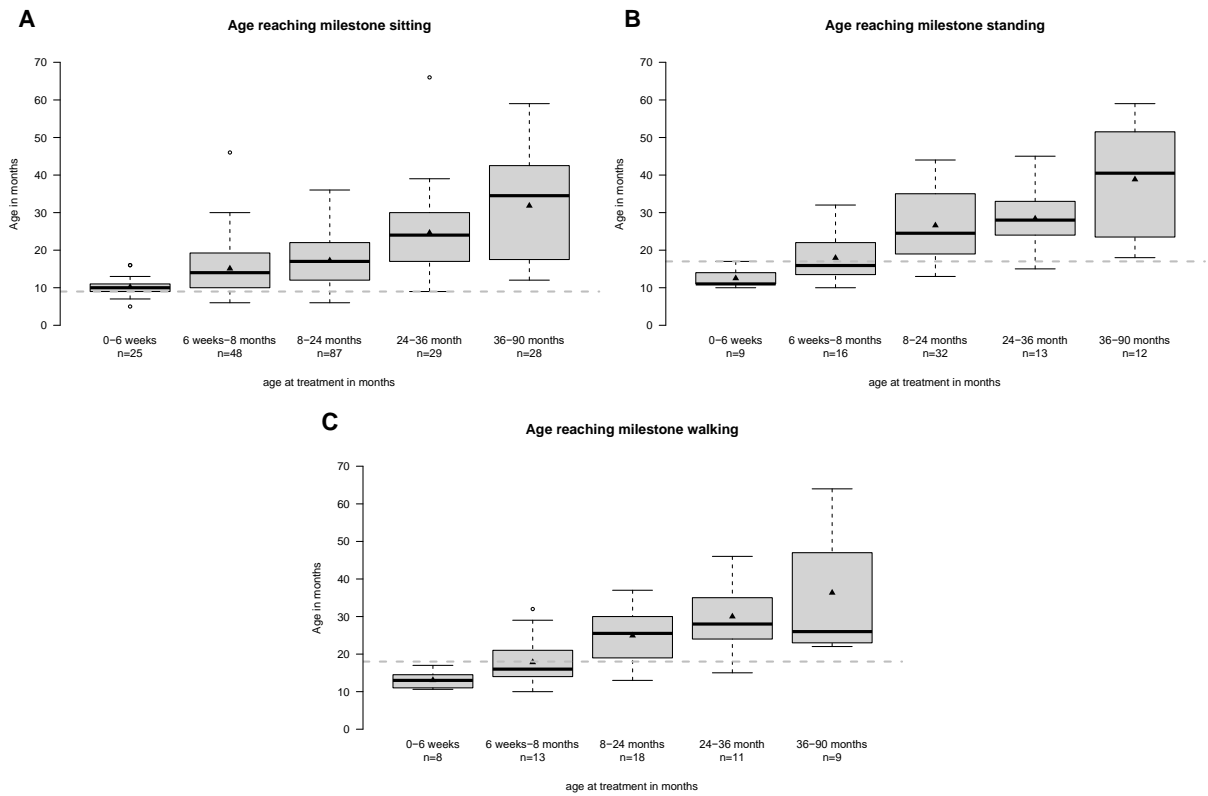

**Supplementary Figure 10: Boxplot of median age of the milestones sitting, standing and walking.** Shown are the boxplots of the age patients achieved the milestones of sitting (A), standing (B) and waling (C) divided in age-groups. The older the patients were at the time of GAT, the older they gained the milestone. The dotted line depicts the maximum normal range children should learn these milestones.

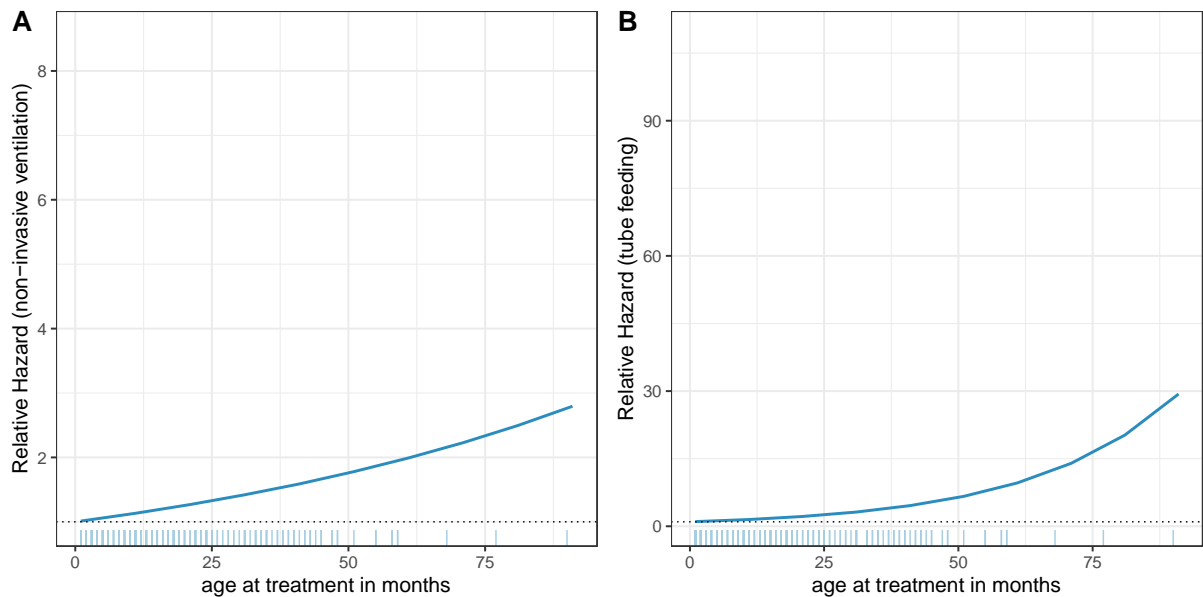

**Supplementary Figure 11: Relative capacity of reaching ventilation and tube feeding estimated from Cox proportional hazard regression.** Shown is the relative risk for respiratory support (A) and nutritional support (B) increases with higher age at treatment ( $p < 0.0001$ ).

## Tables

| P     | gender | Age at infusion, months | Time death, months | Distance to infusion, months | reason                                                                                                              |
|-------|--------|-------------------------|--------------------|------------------------------|---------------------------------------------------------------------------------------------------------------------|
| 29003 | F      | 9                       | 12                 | 3                            | Pneumonia/respiratory failure                                                                                       |
| 44848 | F      | 13                      | 31                 | 18                           | Cardiac arrest                                                                                                      |
| 49964 | M      | 11                      | 15                 | 4                            | Aspiration/ cerebral hypoxia, termination of life support measures                                                  |
| 62550 | M      | 16                      | 43                 | 27                           | Respiratory infect, sudden death                                                                                    |
| 99143 | M      | 1                       | 5                  | 4                            | Respiratory insufficiency, additional hypoplastic aorta, Deletion MIB1-Gen, duplikation in the PAR1 Region x-p22.23 |

Supplementary Table 1: Patient characteristics of lethal causes.

| Influencing factors | Timepoint (months) | n                 | Mean±SD (range)   | Mean change ±SD (range) t0-t6 | Mean change ±SD (range) t0-t12 |                            |                         |                          |
|---------------------|--------------------|-------------------|-------------------|-------------------------------|--------------------------------|----------------------------|-------------------------|--------------------------|
| <b>Age</b>          | ≤6 weeks           | 0                 | 74                | 40.6±13.7 (2-60)              | n=55<br>14.6±10.2 (-7-45)      | n=16<br>14.0±12.7 (-6-45)  |                         |                          |
|                     |                    | 6                 | 55                | 54.8±11.5 (27-64)             |                                |                            |                         |                          |
|                     |                    | 12                | 16                | 55.4±11.4 (25-64)             |                                |                            |                         |                          |
|                     |                    | 18                | 6                 | 56.2±11.7 (35-64)             |                                |                            |                         |                          |
|                     |                    | 24                | 2                 | 61.0±4.2 (58-64)              |                                |                            |                         |                          |
|                     |                    | >27               | -                 | -                             |                                |                            |                         |                          |
|                     | 6 weeks - 8 months | -6                | 21                | 29.1±16.7 (5-62)              | n=52<br>11.9±9.0 (-6-37)       | n=39<br>17.1±13.5 (-22-47) |                         |                          |
|                     |                    | 0                 | 60                | 36.1±16.4 (9-64)              |                                |                            |                         |                          |
|                     |                    | 6                 | 55                | 47.5±12.7 (17-64)             |                                |                            |                         |                          |
|                     |                    | 12                | 40                | 48.9±9.8 (25-64)              |                                |                            |                         |                          |
|                     |                    | 18                | 27                | 50.4±9.1 (31-64)              |                                |                            |                         |                          |
|                     |                    | 24                | 12                | 50.6±5.4 (40-58)              |                                |                            |                         |                          |
|                     | 8 - 24 months      | >27               | 4                 | 48.8±7.2 (41-58)              | n=68<br>6.2±6.5 (-14-26)       | n=38<br>8.9±7.6 (-11-29)   |                         |                          |
|                     |                    | -6                | 39                | 38.4±13.7 (11-62)             |                                |                            |                         |                          |
|                     |                    | 0                 | 81                | 42.0±12.0 (4-64)              |                                |                            |                         |                          |
|                     |                    | 6                 | 73                | 49.3±9.3 (26-64)              |                                |                            |                         |                          |
|                     |                    | 12                | 41                | 49.2±9.5 (22-64)              |                                |                            |                         |                          |
|                     |                    | 18                | 21                | 48.3±6.8 (35-60)              |                                |                            |                         |                          |
|                     | 24 – 36 months     | 24                | 13                | 49.0±8.2 (33-60)              | n=9<br>1.9±3.4 (-3-7)          | n=6<br>4.5±6.8 (-2-16)     |                         |                          |
|                     |                    | >27               | 8                 | 47.1±7.6 (36-56)              |                                |                            |                         |                          |
|                     |                    | -6                | 6                 | 46.0±10.5 (28-58)             |                                |                            |                         |                          |
| 0                   |                    | 9                 | 44.9±8.7 (30-58)  |                               |                                |                            |                         |                          |
| 6                   |                    | 9                 | 46.8±9.4 (33-60)  |                               |                                |                            |                         |                          |
| 12                  |                    | 6                 | 50.5±6.0 (39-56)  |                               |                                |                            |                         |                          |
| >36 months          | 18                 | 6                 | 48.7±8.0 (34-56)  | n=5<br>2.8±3.0 (0-7)          | n=4<br>-0.8±5.5 (-8-4)         |                            |                         |                          |
|                     | 24                 | 3                 | 46.7±10.1 (35-53) |                               |                                |                            |                         |                          |
|                     | >27                | 1                 | 36.0              |                               |                                |                            |                         |                          |
|                     | -6                 | 7                 | 47.6±7.6 (38-58)  |                               |                                |                            |                         |                          |
|                     | 0                  | 7                 | 44.6±9.7 (30-56)  |                               |                                |                            |                         |                          |
|                     | 6                  | 7                 | 44.0±8.2 (37-61)  |                               |                                |                            |                         |                          |
| <b>Sex</b>          | Female             | 12                | 5                 | 37.2±6.9 (32-49)              | n=98<br>10.2±10.3 (-14-45)     | n=54<br>12.3±13.4 (-22-47) |                         |                          |
|                     |                    | 18                | 4                 | 37.5±9.0 (27-48)              |                                |                            |                         |                          |
|                     |                    | 24                | 1                 | 41.0                          |                                |                            |                         |                          |
|                     |                    | >27               | -                 | -                             |                                |                            |                         |                          |
|                     |                    | 0                 | 125               | 41.4±13.4 (4-64)              |                                |                            |                         |                          |
|                     |                    | 6                 | 104               | 51.4±10.0 (28-64)             |                                |                            |                         |                          |
|                     | Male               | 12                | 58                | 51.1±11.1 (22-64)             |                                |                            | n=91<br>9.6±8.0 (-8-36) | n=49<br>12.0±9.8 (-6-33) |
|                     |                    | 18                | 26                | 52.2±9.6 (31-64)              |                                |                            |                         |                          |
|                     |                    | 24                | 9                 | 49.5±9.6 (33-60)              |                                |                            |                         |                          |
|                     |                    | >27               | 2                 | 45.5±10.6 (38-53)             |                                |                            |                         |                          |
|                     |                    | -6                | 37                | 36.7±16.2 (5-64)              |                                |                            |                         |                          |
|                     |                    | 0                 | 106               | 38.8±14.2 (2-64)              |                                |                            |                         |                          |
| 6                   | 95                 | 48.3±12.2 (17-64) |                   |                               |                                |                            |                         |                          |
| 12                  | 50                 | 47.8±8.7 (25-64)  |                   |                               |                                |                            |                         |                          |
| 18                  | 38                 | 47.2±8.2 (27-64)  |                   |                               |                                |                            |                         |                          |
| 24                  | 22                 | 50.0±6.9 (35-64)  |                   |                               |                                |                            |                         |                          |
| >27                 | 11                 | 47.0±7.6 (36-58)  |                   |                               |                                |                            |                         |                          |

|                         |              |                                       |                                          |                                                                                                                                             |                                                                                                                                           |                                                                                     |                                                      |             |   |
|-------------------------|--------------|---------------------------------------|------------------------------------------|---------------------------------------------------------------------------------------------------------------------------------------------|-------------------------------------------------------------------------------------------------------------------------------------------|-------------------------------------------------------------------------------------|------------------------------------------------------|-------------|---|
| <b>Presymptomatic</b>   | <b>Yes</b>   | -6<br>0<br>6<br>12<br>18<br>24<br>>27 | 5<br>60<br>42<br>15<br>5<br>1<br>-       | 42.2±13.5 (28-56)<br>48.7±9.5 (25-64)<br>60.4±6.5 (34-64)<br>62.1±4.0 (52-64)<br>64.0±0.0 (64-64)<br>64.0<br>-                              | n=42<br>11.6±8.1 (-5-31)                                                                                                                  | n=15<br>11.0±10.3 (0-39)                                                            |                                                      |             |   |
|                         | <b>No</b>    | -6<br>0<br>6<br>12<br>18<br>24<br>>27 | 68<br>171<br>157<br>93<br>59<br>30<br>13 | 36.9±15.2 (5-62)<br>37.2±13.9 (2-64)<br>47.1±10.5 (17-64)<br>47.5±9.4 (22-64)<br>48.0±8.3 (27-64)<br>49.4±7.2 (33-60)<br>46.8±7.6 (36-58)   | n=147<br>9.4±9.5 (-14-45)                                                                                                                 | n=88<br>12.4±12.1 (-22-47)                                                          |                                                      |             |   |
| <b>SMN2 copy number</b> | <b>Two</b>   | -6<br>0<br>6<br>12<br>18<br>24<br>>27 | 59<br>154<br>140<br>88<br>51<br>27<br>12 | 35.6±15.8 (5-62)<br>36.6±14.4 (2-64)<br>47.8±11.2 (17-64)<br>49.0±10.5 (22-64)<br>48.9±8.3 (31-64)<br>50.0±7.5 (33-64)<br>47.7±7.1 (36-58)  | n=131<br>10.7±9.5 (-8-45)                                                                                                                 | n=83<br>13.0±12.5 (-22-47)                                                          |                                                      |             |   |
|                         | <b>Three</b> | -6<br>0<br>6<br>12<br>18<br>24<br>>27 | 14<br>77<br>59<br>20<br>13<br>4<br>1     | 43.6±9.1 (28-58)<br>47.3±9.1 (27-64)<br>55.0±9.5 (31-64)<br>52.0±8.4 (35-64)<br>50.8±11.9 (27-64)<br>49.0±9.3 (35-54)<br>36.0               | n=58<br>8.2±8.3 (-14-28)                                                                                                                  | n=20<br>8.6±7.6 (-2-29)                                                             |                                                      |             |   |
| <b>Pretreatment</b>     | no           | -6<br>0<br>6<br>12<br>18<br>24<br>>27 | 2<br>126<br>102<br>48<br>28<br>10<br>2   | 19.5±20.5 (5-34)<br>37.8±14.0 (2-60)<br>50.0±12.4 (17-64)<br>49.8±11.1 (25-64)<br>49.7±10.3 (31-64)<br>50.3±9.4 (35-64)<br>37.0±1.4 (36-38) | n=101<br>12.6±10.2 (-14-45)                                                                                                               | n=48<br>16.3±12.5 (0-47)                                                            |                                                      |             |   |
|                         |              | nusinersen                            | -6<br>0<br>6<br>12<br>18<br>24<br>>27    | 65<br>91<br>88<br>59<br>35<br>21<br>11                                                                                                      | 38.2±15.0 (5-64)<br>43.3±12.7 (13-64)<br>49.8±9.9 (26-64)<br>49.2±9.4 (22-64)<br>48.5±7.8 (27-60)<br>49.7±6.8 (33-60)<br>48.5±6.8 (36-58) | n=80<br>7.3±6.9 (-6-36)                                                             | n=54<br>8.6±9.9 (-22-34)                             |             |   |
|                         |              |                                       | risdiplam                                | -6<br>0<br>6<br>12<br>18<br>24<br>>27                                                                                                       | 5<br>12<br>8<br>1<br>1<br>-<br>-                                                                                                          | 36.8±9.1 (27-49)<br>41.7±16.7 (4-64)<br>52.4±10.0 (34-64)<br>61.0<br>64.0<br>-<br>- | n=7<br>3.9±5.1 (-3-12)                               | n=1<br>2.0  |   |
|                         |              |                                       |                                          | nusinersen<br>+risdiplam                                                                                                                    | -6<br>0<br>6<br>12<br>18<br>24<br>>27                                                                                                     | 1<br>2<br>1<br>-<br>-<br>-<br>-                                                     | 16.0<br>42.5±3.5 (40-45)<br>37.0<br>-<br>-<br>-<br>- | n=1<br>-8.0 | - |

**Supplementary Table 2: Influencing factors sex, presymptomatic diagnosis at treatment and SMN2 copy number on CHOP INTEND score.** Data are scores depicted in mean±SD (range) unless otherwise specified. CHOP INTEND=Children's Hospital of Philadelphia Infant Test of Neuromuscular Disorders. SMN=survival motor neuron gene.

| Influencing factors    | Timepoint (months) | n | Mean+SD (range)  | Mean change ±SD (range) t0-t6 | Mean change ±SD (range) t0-t12 |
|------------------------|--------------------|---|------------------|-------------------------------|--------------------------------|
| <b>Age</b><br>≤6 weeks | t0                 | - | -                | -                             | -                              |
|                        | t6                 | 2 | 14.5±12.0 (6-23) |                               |                                |
|                        | t12                | 6 | 30.8±8.5 (20-40) |                               |                                |
|                        | t18                | 5 | 30.2±8.0 (21-40) |                               |                                |
|                        | t24                | 3 | 34.0±7.9 (25-40) |                               |                                |

|                         |               |     |                   |                   |                         |                         |
|-------------------------|---------------|-----|-------------------|-------------------|-------------------------|-------------------------|
| 6 weeks - 8 months      | >t27          | 1   | 37.0              |                   |                         |                         |
|                         | t-6           | -   | -                 | -                 | -                       |                         |
|                         | t0            | -   | -                 |                   |                         |                         |
|                         | t6            | 7   | 21.0±8.5 (4-28)   |                   |                         |                         |
|                         | t12           | 13  | 25.7±11.7 (4-40)  |                   |                         |                         |
|                         | t18           | 14  | 26.5±10.5 (9-40)  |                   |                         |                         |
|                         | t24           | 11  | 23.4±12.4 (7-39)  |                   |                         |                         |
|                         | >t27          | 7   | 26.9±11.5 (8-40)  |                   |                         |                         |
|                         | 8 - 24 months | t-6 | 2                 | 10.5±3.5 (8-13)   | n=8                     | n=10                    |
|                         |               | t0  | 13                | 25.4±9.2 (9-36)   | 4.6±3.6 (0-9)           | 9.2±7.3 (-1-21)         |
|                         |               | t6  | 35                | 22.5±11.0 (5-40)  |                         |                         |
|                         |               | t12 | 47                | 22.5±10.4 (6-40)  |                         |                         |
|                         |               | t18 | 41                | 24.3±9.9 (7-40)   |                         |                         |
| t24                     |               | 39  | 23.9±9.7 (7-40)   |                   |                         |                         |
| >t27                    |               | 21  | 23.7±8.6 (10-37)  |                   |                         |                         |
| 24 – 36 months          | t-6           | 9   | 27.4±12.9 (4-40)  | n=20              | n=16                    |                         |
|                         | t0            | 21  | 23.6±11.1 (2-36)  | 5.5±6.5 (-4-25)   | 6.1±5.1 (0-23)          |                         |
|                         | t6            | 25  | 27.3±11.9 (6-40)  |                   |                         |                         |
|                         | t12           | 24  | 26.7±12.6 (5-40)  |                   |                         |                         |
|                         | t18           | 21  | 26.9±12.6 (5-40)  |                   |                         |                         |
|                         | t24           | 12  | 30.8±10.6 (7-40)  |                   |                         |                         |
|                         | >t27          | 3   | 27.7±13.6 (12-36) |                   |                         |                         |
| >36 months              | t-6           | 14  | 20.6±12.8 (2-40)  | n=17              | n=13                    |                         |
|                         | t0            | 20  | 24.0±12.3 (3-40)  | 1.5±4.5 (-4-11)   | 0.3±4.7 (-5-12)         |                         |
|                         | t6            | 20  | 24.0±11.7 (0-40)  |                   |                         |                         |
|                         | t12           | 16  | 23.5±12.9 (6-40)  |                   |                         |                         |
|                         | t18           | 13  | 25.6±10.8 (7-36)  |                   |                         |                         |
|                         | t24           | 7   | 31.3±8.6 (18-40)  |                   |                         |                         |
|                         | >t27          | 2   | 23.5±14.8 (13-34) |                   |                         |                         |
| <b>Sex</b>              | Female        | -6  | 14                | 23.4±13.6 (2-40)  | n=30<br>3.9±5.2 (-4-20) | n=27<br>5.2±6.5 (-5-21) |
|                         |               | 0   | 36                | 25.0±10.9 (2-340) |                         |                         |
|                         |               | 6   | 51                | 25.4±11.7 (0-40)  |                         |                         |
|                         |               | 12  | 63                | 26.3±11.4 (5-40)  |                         |                         |
|                         |               | 18  | 54                | 26.2±10.9 (7-40)  |                         |                         |
|                         |               | 24  | 38                | 27.1±10.1 (7-40)  |                         |                         |
|                         |               | >27 | 14                | 27.1±10.1 (12-40) |                         |                         |
|                         | Male          | -6  | 11                | 20.8±12.5 (4-40)  | n=15<br>3.7±6.5 (-4-25) | n=12<br>4.3±6.8 (-5-23) |
|                         |               | 0   | 18                | 22.4±11.1 (5-35)  |                         |                         |
|                         |               | 6   | 38                | 21.8±10.7 (4-40)  |                         |                         |
|                         |               | 12  | 43                | 21.8±11.1 (4-40)  |                         |                         |
|                         |               | 18  | 40                | 25.0±10.1 (5-40)  |                         |                         |
|                         |               | 24  | 34                | 24.9±11.0 (7-40)  |                         |                         |
|                         |               | >27 | 20                | 23.7±9.4 (8-37)   |                         |                         |
| <b>Presymptomatic</b>   | Yes           | -6  | 2                 | 37.0±4.2 (34-40)  | n=2<br>-0.5±5.0 (-4-3)  | n=1<br>4.0              |
|                         |               | 0   | 2                 | 34.5±2.1 (33-36)  |                         |                         |
|                         |               | 6   | 8                 | 27.4±10.0 (6-40)  |                         |                         |
|                         |               | 12  | 8                 | 32.6±9.2 (14-40)  |                         |                         |
|                         |               | 18  | 7                 | 38.7±2.0 (35-40)  |                         |                         |
|                         |               | 24  | 4                 | 38.8±2.5 (35-40)  |                         |                         |
|                         |               | >27 | 2                 | 37.5±3.5 (35-40)  |                         |                         |
|                         | No            | -6  | 23                | 21.0±12.6 (2-40)  | n=43<br>4.0±5.6 (-4-25) | n=38<br>5.0±6.6 (-5-23) |
|                         |               | 0   | 52                | 23.8±11.0 (2-36)  |                         |                         |
|                         |               | 6   | 81                | 23.5±11.4 (0-40)  |                         |                         |
|                         |               | 12  | 98                | 23.8±11.4 (4-40)  |                         |                         |
|                         |               | 18  | 87                | 24.6±10.2 (5-40)  |                         |                         |
|                         |               | 24  | 68                | 25.4±10.3 (7-40)  |                         |                         |
|                         |               | >27 | 32                | 24.3±9.4 (8-40)   |                         |                         |
| <b>SMN2 copy number</b> | Two           | -6  | 12                | 17.1±12.2 (4-40)  | n=14<br>2.5±3.5 (-4-9)  | n=10<br>4.0±8.3 (-5-21) |
|                         |               | 0   | 16                | 19.0±11.4 (2-36)  |                         |                         |
|                         |               | 6   | 38                | 18.8±10.2 (4-40)  |                         |                         |
|                         |               | 12  | 54                | 19.6±10.1 (4-40)  |                         |                         |
|                         |               | 18  | 52                | 21.6±10.3 (5-40)  |                         |                         |
|                         |               | 24  | 39                | 22.5±10.9 (7-40)  |                         |                         |
|                         |               | >27 | 23                | 22.6±10.1 (8-36)  |                         |                         |
|                         | Three         | -6  | 13                | 27.1±12.1 (2-40)  | n=31<br>4.4±6.3 (-4-25) | n=29<br>5.3±5.9 (-5-23) |
|                         |               | 0   | 38                | 26.3±10.1 (3-36)  |                         |                         |

|                     |                                       |                                        |                                                                                                                                         |                         |                         |
|---------------------|---------------------------------------|----------------------------------------|-----------------------------------------------------------------------------------------------------------------------------------------|-------------------------|-------------------------|
|                     | 6<br>12<br>18<br>24<br>>27            | 51<br>52<br>42<br>33<br>11             | 27.6±10.7 (0-40)<br>29.5±10.5 (6-40)<br>30.8±8.5 (13-40)<br>30.4±8.3 (17-40)<br>30.4±6.4 (17-36)                                        |                         | -                       |
| <b>Pretreatment</b> |                                       |                                        |                                                                                                                                         |                         |                         |
| no                  | -6<br>0<br>6<br>12<br>18<br>24<br>>27 | -<br>17<br>26<br>32<br>27<br>20<br>4   | -<br>27.8±8.3 (10-40)<br>28.2±11.1 (4-40)<br>29.0±10.7 (4-40)<br>28.2±9.8 (9-40)<br>27.8±10.4 (7-40)<br>30.0±11.4 (13-37)               | n=15<br>6.0±5.4 (-2-20) | n=13<br>7.4±5.5 (-1-20) |
| nusinersen          | -6<br>0<br>6<br>12<br>18<br>24<br>>27 | 24<br>36<br>61<br>73<br>67<br>52<br>30 | 22.7±13.1 (2-40)<br>22.8±11.6 (2-40)<br>22.7±11.2 (0-40)<br>22.4±11.3 (5-40)<br>24.7±10.7 (5-40)<br>25.5±10.56(7-40)<br>24.4±9.5 (8-40) | n=28<br>2.7±5.5(-2-25)  | n=26<br>3.7±6.8 (-5-23) |
| risdiplam           | -6<br>0<br>6<br>12<br>18<br>24<br>>27 | 1<br>1<br>2<br>1<br>-<br>-<br>-        | 13.0<br>9.0<br>23.5±2.1 (22-25)<br>28.0<br>-<br>-<br>-                                                                                  | -                       | -                       |

**Supplementary Table 3: Influencing factors sex, presymptomatic diagnosis at treatment and SMN2 copy number on HFMSE score.** Data are scores depicted in mean±SD (range) unless otherwise specified. SMN=survival motor neuron gene. HFMSE=Hammersmith Functional Motor Scale-Expanded.

| Influencing factors    | Timepoint (months) | n  | Mean+SD (range)  | Mean change ±SD (range) t0-t6 | Mean change ±SD (range) t0-t12 |
|------------------------|--------------------|----|------------------|-------------------------------|--------------------------------|
| <b>Age</b><br>≤6 weeks | t0                 | -  | -                | -                             | -                              |
|                        | t6                 | -  | -                | -                             | -                              |
|                        | t12                | -  | -                | -                             | -                              |
|                        | t18                | -  | -                | -                             | -                              |
|                        | t24                | -  | -                | -                             | -                              |
|                        | >t27               | -  | -                | -                             | -                              |
| 6 weeks - 8 months     | t-6                | -  | -                | -                             | -                              |
|                        | t0                 | -  | -                | -                             | -                              |
|                        | t6                 | -  | -                | -                             | -                              |
|                        | t12                | -  | -                | -                             | -                              |
|                        | t18                | -  | -                | -                             | -                              |
|                        | >t27               | -  | -                | -                             | -                              |
| 8 - 24 months          | t-6                | -  | -                | -                             | -                              |
|                        | t0                 | 1  | 22.0             | -                             | -                              |
|                        | t6                 | 10 | 14.5±9.1 (4-29)  | -                             | -                              |
|                        | t12                | 25 | 18.1±8.3 (5-35)  | -                             | -                              |
|                        | t18                | 32 | 19.2±6.9 (5-33)  | -                             | -                              |
|                        | >t27               | 21 | 20.0±6.8 (5-31)  | -                             | -                              |
| 24 - 36months          | t-6                | 4  | 14.0±6.1 (6-20)  | n=9<br>3.6±5.7 (-10-8)        | n=8<br>5.9±4.9 (-3-14)         |
|                        | t0                 | 10 | 20.2±7.5 (10-32) |                               |                                |
|                        | t6                 | 17 | 20.6±10.2 (0-34) |                               |                                |
|                        | t12                | 19 | 23.5±7.1 (10-34) |                               |                                |
|                        | t18                | 17 | 23.1±7.9 (9-36)  |                               |                                |
|                        | >t27               | 4  | 24.3±12.9 (8-36) |                               |                                |
| >36 months             | t-6                | 14 | 18.8±9.6 (6-31)  | n=16<br>2.6±2.7 (-2-9)        | n=11<br>2.2±2.6 (-2-7)         |
|                        | t0                 | 20 | 18.1±10.8 (0-36) |                               |                                |
|                        | t6                 | 23 | 20.4±9.0 (8-35)  |                               |                                |
|                        | t12                | 18 | 19.0±10.2 (4-36) |                               |                                |
|                        | t18                | 18 | 20.1±10.2 (1-35) |                               |                                |
|                        | t24                | 10 | 23.1±11.2 (3-35) |                               |                                |

|                         |                                       |                                        |                                                                                                                                    |                         |                         |
|-------------------------|---------------------------------------|----------------------------------------|------------------------------------------------------------------------------------------------------------------------------------|-------------------------|-------------------------|
|                         | >t27                                  | 7                                      | 17.6±8.5 (8-33)                                                                                                                    |                         |                         |
| <b>Sex</b>              |                                       |                                        |                                                                                                                                    |                         |                         |
| Female                  | -6<br>0<br>6<br>12<br>18<br>24<br>>27 | 11<br>18<br>24<br>33<br>33<br>26<br>14 | 18.6±8.9 (9-31)<br>19.8±9.6 (0-36)<br>21.5±9.0 (5-35)<br>21.9±8.3 (4-36)<br>21.0±7.8 (1-36)<br>21.6±9.3 (3-37)<br>20.8±7.8 (5-36)  | n=15<br>3.8±2.9 (-2-8)  | n=12<br>4.6±4.3 (-2-14) |
| Male                    | -6<br>0<br>6<br>12<br>18<br>24<br>>27 | 7<br>13<br>26<br>29<br>34<br>25<br>18  | 16.3±9.6 (6-30)<br>17.7±9.7 (7-33)<br>17.2±9.7 (0-34)<br>17.9±8.9 (5-35)<br>19.8±8.6 (5-33)<br>20.9±9.0 (0-35)<br>19.3±8.3 (8-33)  | n=10<br>1.7±5.1 (-10-9) | n=7<br>2.3±3.5 (-3-7)   |
| <b>Presymptomatic</b>   |                                       |                                        |                                                                                                                                    |                         |                         |
| Yes                     | -6<br>0<br>6<br>12<br>18<br>24<br>>27 | -<br>-<br>1<br>1<br>3<br>2<br>1        | -<br>-<br>25.0<br>27.0<br>28.0±2.6 (10-31)<br>16.0±22.6 (0-32)<br>19.0                                                             | -                       | -                       |
| No                      | -6<br>0<br>6<br>12<br>18<br>24<br>>27 | 18<br>31<br>49<br>61<br>64<br>49<br>31 | 17.7±9.0 (6-31)<br>18.9±9.6 (0-36)<br>19.2±9.6 (0-35)<br>19.9±8.8 (4-36)<br>20.1±8.2 (1-36)<br>21.5±8.6 (3-37)<br>20.0±8.1 (5-36)  | n=25<br>3.0±4.0 (-10-9) | n=19<br>3.7±4.1 (-3-14) |
| <b>SMN2 copy number</b> |                                       |                                        |                                                                                                                                    |                         |                         |
| Two                     | -6<br>0<br>6<br>12<br>18<br>24<br>>27 | 9<br>9<br>20<br>25<br>31<br>24<br>21   | 14.6±7.1 (6-30)<br>12.1±9.3 (0-33)<br>14.5±9.1 (0-34)<br>14.9±6.5 (4-27)<br>16.5±6.9 (1-31)<br>17.4±7.1 (3-32)<br>16.7±6.0 (5-26)  | n=7<br>0.7±5.9 (-10-9)  | n=5<br>3.4±3.9 (-2-7)   |
| Three                   | -6<br>0<br>6<br>12<br>18<br>24<br>>27 | 9<br>22<br>30<br>37<br>36<br>27<br>11  | 20.9±9.9 (6-31)<br>21.7±8.4 (6-36)<br>22.5±8.6 (8-35)<br>23.5±8.4 (8-36)<br>23.8±7.7 (8-36)<br>24.7±9.4 (0-37)<br>26.3±7.7 (8-36)  | n=18<br>3.8±2.7 (-1-8)  | n=14<br>3.9±4.3 (-3-14) |
| <b>Pretreatment</b>     |                                       |                                        |                                                                                                                                    |                         |                         |
| no                      | -6<br>0<br>6<br>12<br>18<br>24<br>27  | -<br>7<br>8<br>12<br>13<br>11<br>6     | -<br>20.1±7.3 (10-33)<br>23.8±5.9 (16-34)<br>23.9±6.7 (1-32)<br>22.4±6.5 (9-32)<br>18.3±10.7 (3-34)<br>17.8±10.3 (5-33)            | n=6<br>5.0±2.6 (1-8)    | n=3<br>9.7±4.0 (6-14)   |
| nusinersen              | -6<br>0<br>6<br>12<br>18<br>24<br>>27 | 18<br>24<br>42<br>50<br>54<br>40<br>26 | 17.7±9.0 (6-31)<br>18.5±10.3 (0-36)<br>18.5±9.9 (0-35)<br>19.1±9.0 (4-36)<br>20.0±8.5 (1-36)<br>22.1±8.5 (0-37)<br>20.5±7.5 (8-36) | n=19<br>2.3±4.1 (-10-9) | n=16<br>2.6±3.1 (-3-7)  |

**Supplementary Table 4 Influencing factors sex, SMA type and SMN2 copy number on RULM score.** Data are scores depicted in mean±SD (range) unless otherwise specified. SMN=survival motor neuron gene. RULM= Revised Upper Limb Module.

| Influencing factors    | Timepoint (months) | n  | Mean+SD (range) | Mean change ±SD (range) t0-t6 | Mean change ±SD (range) t0-t12 |
|------------------------|--------------------|----|-----------------|-------------------------------|--------------------------------|
| <b>Age</b><br>≤6 weeks | t0                 | 62 | 1.1±1.1 (0-4)   | n=46<br>8.6±4.8 (1-17)        | n=17<br>18.6±7.0 (1-25)        |
|                        | t6                 | 46 | 9.7±5.1 (1-18)  |                               |                                |
|                        | t12                | 17 | 19.6±7.4 (2-26) |                               |                                |
|                        | t18                | 7  | 20.0±7.8 (4-26) |                               |                                |



|                         |      |     |                  |                          |                          |                          |
|-------------------------|------|-----|------------------|--------------------------|--------------------------|--------------------------|
| 6 weeks - 8 months      | t24  | 3   | 23.0±5.2 (17-26) | n=52<br>6.3±4.7 (-2-17)  | n=41<br>11.1±6.4 (0-26)  |                          |
|                         | >t27 | -   | -                |                          |                          |                          |
| 8 - 24 months           | t-6  | 21  | 1.5±1.5 (0-5)    | n=85<br>4.1±3.7 (-7-16)  | n=69<br>6.0±4.9 (-6-18)  |                          |
|                         | t0   | 61  | 2.9±3.8 (0-16)   |                          |                          |                          |
|                         | t6   | 52  | 9.2±6.4 (0-26)   |                          |                          |                          |
|                         | t12  | 41  | 13.8±7.7 (1-26)  |                          |                          |                          |
|                         | t18  | 32  | 16.0±7.1 (3-26)  |                          |                          |                          |
|                         | t24  | 14  | 16.4±6.9 (3-26)  |                          |                          |                          |
|                         | >t27 | 7   | 19.9±7.6 (8-26)  |                          |                          |                          |
|                         |      |     |                  |                          |                          |                          |
| 24 - 36months           | t-6  | 47  | 6.3±5.9 (0-24)   | n=26<br>0.7±3.0 (-7-6)   | n=24<br>1.8±3.3 (-6-8)   |                          |
|                         | t0   | 97  | 10.8±7.0 (0-25)  |                          |                          |                          |
|                         | t6   | 86  | 15.3±6.9 (2-26)  |                          |                          |                          |
|                         | t12  | 70  | 17.4±6.8 (4-26)  |                          |                          |                          |
|                         | t18  | 53  | 18.4±6.4 (2-26)  |                          |                          |                          |
|                         | t24  | 35  | 19.6±5.5 (5-26)  |                          |                          |                          |
|                         | >t27 | 12  | 15.0±7.1 (5-26)  |                          |                          |                          |
|                         |      |     |                  |                          |                          |                          |
| >36 months              | -6   | 15  | 17.6±6.1 (10-26) | n=25<br>1.6±2.0 (-2-7)   | n=21<br>1.0±3.6 (-6-8)   |                          |
|                         | 0    | 28  | 17.5±7.2 (0-26)  |                          |                          |                          |
|                         | 6    | 26  | 18.3±7.7 (0-26)  |                          |                          |                          |
|                         | 12   | 24  | 19.2±6.4 (4-26)  |                          |                          |                          |
|                         | 18   | 19  | 18.2±6.9 (3-26)  |                          |                          |                          |
|                         | 24   | 12  | 19.8±7.7 (0-26)  |                          |                          |                          |
|                         | >27  | 2   | 20.0±8.5 (14-26) |                          |                          |                          |
|                         |      |     |                  |                          |                          |                          |
| Sex<br>Female           | -6   | 53  | 8.9±8.5 (0-26)   | n=129<br>5.5±5.1 (-7-17) | n=97<br>8.7±8.1 (-6-26)  |                          |
|                         | 0    | 153 | 8.5±8.4 (0-26)   |                          |                          |                          |
|                         | 6    | 129 | 14.6±6.9 (1-26)  |                          |                          |                          |
|                         | 12   | 97  | 18.6±6.6 (2-26)  |                          |                          |                          |
|                         | 18   | 61  | 19.7±6.1 (2-26)  |                          |                          |                          |
|                         | 24   | 28  | 20.4±6.1 (3-26)  |                          |                          |                          |
|                         | >27  | 8   | 18.0±8.7 (5-26)  |                          |                          |                          |
|                         |      |     |                  |                          |                          |                          |
| Male                    | -6   | 50  | 8.6±7.6 (0-26)   | n=105<br>4.0±4.1 (-6-16) | n=75<br>5.3±5.7 (-6-23)  |                          |
|                         | 0    | 124 | 7.6±7.8 (0-26)   |                          |                          |                          |
|                         | 6    | 107 | 12.0±7.8 (0-26)  |                          |                          |                          |
|                         | 12   | 77  | 14.7±7.8 (1-26)  |                          |                          |                          |
|                         | 18   | 65  | 16.1±7.1 (3-26)  |                          |                          |                          |
|                         | 24   | 41  | 18.3±6.4 (0-26)  |                          |                          |                          |
|                         | >27  | 14  | 16.9±6.6 (5-26)  |                          |                          |                          |
|                         |      |     |                  |                          |                          |                          |
| Presymptomatic<br>Yes   | -6   | 11  | 9.8±10.9 (0-26)  | n=43<br>10.1±4.7 (-1-17) | n=20<br>16.5±8.6 (0-26)  |                          |
|                         | 0    | 60  | 4.2±6.9 (0-26)   |                          |                          |                          |
|                         | 6    | 43  | 15.0±5.7 (3-26)  |                          |                          |                          |
|                         | 12   | 20  | 23.4±3.0 (16-26) |                          |                          |                          |
|                         | 18   | 11  | 25.2±1.3 (23-26) |                          |                          |                          |
|                         | 24   | 4   | 25.5±1.0 (24-26) |                          |                          |                          |
|                         | >27  | 2   | 26.0±0.0 (26-26) |                          |                          |                          |
|                         | No   | -6  | 92               | 8.7±7.7 (0-26)           | n=191<br>3.6±3.8 (-7-16) | n=152<br>6.0±6.2 (-6-21) |
|                         |      | 0   | 217              | 9.2±8.1 (0-26)           |                          |                          |
|                         |      | 6   | 193              | 13.1±7.8 (0-26)          |                          |                          |
|                         |      | 12  | 154              | 16.0±7.4 (1-26)          |                          |                          |
|                         |      | 18  | 115              | 17.1±6.8 (2-26)          |                          |                          |
|                         |      | 24  | 65               | 18.7±6.3 (0-26)          |                          |                          |
|                         |      | >27 | 20               | 16.4±7.1 (5-26)          |                          |                          |
| SMN2 copy number<br>Two | -6   | 74  | 7.1±7.3 (0-26)   | n=143<br>4.5±4.2 (-7-17) | n=109<br>7.8±7.2 (-6-23) |                          |
|                         | 0    | 166 | 6.1±7.1 (0-26)   |                          |                          |                          |
|                         | 6    | 145 | 10.7±7.1 (0-26)  |                          |                          |                          |
|                         | 12   | 111 | 14.9±7.3 (1-26)  |                          |                          |                          |
|                         | 18   | 80  | 16.5±7.0 (2-26)  |                          |                          |                          |
|                         | 24   | 43  | 17.7±7.0 (0-26)  |                          |                          |                          |
|                         | >27  | 16  | 15.6±7.7 (5-26)  |                          |                          |                          |
|                         |      |     |                  |                          |                          |                          |
| Three                   |      |     |                  |                          |                          |                          |

|                      |     |     |                  |                 |                  |
|----------------------|-----|-----|------------------|-----------------|------------------|
|                      | -6  | 29  | 13.0±8.5 (1-26)  | n=91            | n=63             |
|                      | 0   | 111 | 11.3±8.7 (0-26)  | 5.3±5.4 (-7-17) | 6.3±7.3 (-6-26)  |
|                      | 6   | 91  | 17.27±5.9 (2-26) |                 |                  |
|                      | 12  | 63  | 20.5±6.0 (3-26)  |                 |                  |
|                      | 18  | 46  | 20.2±7.0 (3-26)  |                 |                  |
|                      | 24  | 26  | 21.5±3.9 (14-26) |                 |                  |
|                      | >27 | 6   | 21.8±3.0 (19-26) |                 |                  |
| <b>Pretreatment</b>  |     |     |                  |                 |                  |
| no                   | -6  | 1   | 0-0              | n=107           | n=65             |
|                      | 0   | 131 | 4.9±7.5 (0-26)   | 6.0±4.9 (-7-17) | 10.6±7.9 (-6-26) |
|                      | 6   | 107 | 11.5±7.3 (0-26)  |                 |                  |
|                      | 12  | 65  | 16.8±8.0 (2-26)  |                 |                  |
|                      | 18  | 39  | 16.7±7.8 (2-26)  |                 |                  |
|                      | 24  | 16  | 20.8±6.6 (3-26)  |                 |                  |
|                      | >27 | 3   | 19.0±11.3 (6-26) |                 |                  |
| nusinersen           | -6  | 95  | 9.2±8.2 (0-26)   | n=120           | n=105            |
|                      | 0   | 134 | 11.4±7.8 (0-26)  | 3.7±4.3 (-7-17) | 5.1±6.0 (-6-23)  |
|                      | 6   | 122 | 15.1±7.2 (0-26)  |                 |                  |
|                      | 12  | 107 | 16.8±7.1 (1-26)  |                 |                  |
|                      | 18  | 86  | 18.3±6.5 (3-26)  |                 |                  |
|                      | 24  | 53  | 18.6±6.2 (0-26)  |                 |                  |
|                      | >27 | 19  | 17.0±6.9 (5-26)  |                 |                  |
| risdiplam            | -6  | 6   | 5.0±4.2 (1-13)   | n=6             | n=2              |
|                      | 0   | 10  | 7.9±5.2 (0-17)   | 6.7±4.3 (1-14)  | 12.5±0.7 (12-13) |
|                      | 6   | 6   | 16.8±5.8 (11-26) |                 |                  |
|                      | 12  | 2   | 19.5±3.5 (17-22) |                 |                  |
|                      | 18  | 1   | 16.0             |                 |                  |
|                      | 24  | -   | -                |                 |                  |
|                      | >27 | -   | -                |                 |                  |
| nusinersen+risdiplam | -6  | 1   | 1-0              | n=1             | -                |
|                      | 0   | 2   | 2.5±0.7 (2-3)    | 0-0             |                  |
|                      | 6   | 1   | 2-0              |                 |                  |
|                      | 12  | -   | -                |                 |                  |
|                      | 18  | -   | -                |                 |                  |
|                      | 24  | -   | -                |                 |                  |
|                      | >27 | -   | -                |                 |                  |

**Supplementary Table 5: Influencing factors sex, presymptomatic diagnosis at treatment and SMN2 copy number on HINE score.** Data are scores depicted in mean±SD (range) unless otherwise specified. SMN=survival motor neuron gene. HINE= Hammersmith Infant Neurological Examination.

|                                                | Sum Sq     | Mean Sq    | NumDF | DenDF      | F value    | Pr(>F)        |
|------------------------------------------------|------------|------------|-------|------------|------------|---------------|
| <b>ANOVA table saturated LME model</b>         |            |            |       |            |            |               |
| follow-up                                      | 1282.01548 | 427.338495 | 3     | 353.676897 | 12.5881958 | 7.7421E-08*** |
| age at treatment                               | 136.627074 | 34.1567686 | 4     | 246.915722 | 1.00616278 | 0.40488146    |
| pretreatment                                   | 424.063068 | 424.063068 | 1     | 253.064639 | 12.4917109 | 0.00048585**  |
| SMN2 copy number                               | 595.836222 | 595.836222 | 1     | 293.118187 | 17.5516671 | 3.704E-05***  |
| presymptomatic diagnosis                       | 942.08741  | 942.08741  | 1     | 330.564871 | 27.7512578 | 2.4924E-07*** |
| follow-up: age at treatment                    | 1536.70837 | 128.059031 | 12    | 349.265562 | 3.77226056 | 2.1164E-05*** |
| follow-up: pretreatment                        | 138.681189 | 46.2270631 | 3     | 351.160719 | 1.36171987 | 0.25428268    |
| follow-up: SMN2 copy number                    | 74.2270054 | 24.7423351 | 3     | 355.176807 | 0.72883993 | 0.53532825    |
| follow-up: presymptomatic diagnosis            | 219.661192 | 73.2203974 | 3     | 353.074819 | 2.15686793 | 0.09282731    |
| <b>ANOVA table backwards reduced LME model</b> |            |            |       |            |            |               |
| follow-up                                      | 1215.6115  | 405.203833 | 3     | 360.196461 | 11.9998377 | 1.6637E-07*** |
| age at treatment                               | 167.100963 | 41.7752409 | 4     | 242.761145 | 1.23714552 | 0.29571801    |
| pretreatment                                   | 594.902132 | 594.902132 | 1     | 220.709161 | 17.6176246 | 3.916E-05***  |
| SMN2 copy number                               | 826.389993 | 826.389993 | 1     | 229.077765 | 24.4729811 | 1.4587E-06*** |
| presymptomatic diagnosis                       | 904.4882   | 904.4882   | 1     | 326.800369 | 26.7858067 | 3.9769E-07*** |
| follow-up: pretreatment                        | 3414.77241 | 284.564367 | 12    | 354.461195 | 8.42718141 | 4.5356E-14*** |
| follow-up: presymptomatic diagnosis            | 361.3701   | 120.4567   | 3     | 359.906424 | 3.56724376 | 0.01435733*   |

**Supplemental Table 6: Linear mixed model of CHOP scores using Type III analysis of variance table with Satterthwaite's method.**

|                                        | Sum Sq     | Mean Sq    | NumDF | DenDF      | F value    | Pr(>F)        |
|----------------------------------------|------------|------------|-------|------------|------------|---------------|
| <b>ANOVA table saturated LME model</b> |            |            |       |            |            |               |
| follow-up                              | 290.664919 | 145.332459 | 2     | 159.879837 | 14.3788405 | 1.8095E-06*** |
| age at treatment                       | 24.4793575 | 6.11983938 | 4     | 128.177842 | 0.60548204 | 0.65938617    |
| pretreatment                           | 31.3357199 | 31.3357199 | 1     | 123.686246 | 3.10028002 | 0.08075035    |
| SMN2 copy number                       | 189.985889 | 189.985889 | 1     | 124.463231 | 18.7967424 | 2.9707E-05*** |
| presymptomatic diagnosis               | 109.925471 | 109.925471 | 1     | 131.129528 | 10.8757591 | 0.00125421**  |
| follow-up: age at treatment            | 353.432155 | 44.1790194 | 8     | 147.260633 | 4.37096488 | 9.3175E-05*** |
| follow-up: pretreatment                | 30.6869764 | 15.3434882 | 2     | 145.505631 | 1.51804746 | 0.22258934    |
| follow-up: SMN2 copy number            | 10.6691328 | 5.33456641 | 2     | 145.940543 | 0.52778904 | 0.59102943    |

|                                                |            |            |   |            |            |               |
|------------------------------------------------|------------|------------|---|------------|------------|---------------|
| follow-up: presymptomatic diagnosis            | 47.9460321 | 23.9730161 | 2 | 156.327538 | 2.37183198 | 0.09665978    |
| <b>ANOVA table backwards reduced LME model</b> |            |            |   |            |            |               |
| follow-up                                      | 430.02619  | 215.013095 | 2 | 156.289517 | 20.9557278 | 8.6565E-09*** |
| age at treatment                               | 21.4472023 | 5.36180058 | 4 | 129.061732 | 0.52257484 | 0.7192951     |
| pretreatment                                   | 304.986821 | 304.986821 | 1 | 125.661953 | 29.7247979 | 2.5328E-07*** |
| SMN2 copy number                               | 93.722649  | 93.722649  | 1 | 132.467398 | 9.13444978 | 0.003012**    |
| presymptomatic diagnosis                       | 387.778499 | 48.4723124 | 8 | 153.338075 | 4.7242359  | 3.3968E-05*** |
| follow-up: age at treatment                    | 290.664919 | 145.332459 | 2 | 159.879837 | 14.3788405 | 1.8095E-06*** |

**Supplemental Table 7: Linear mixed model of HFSME scores using Type III analysis of variance table with Satterthwaite's method.**

|                                                | Sum Sq     | Mean Sq    | NumDF | DenDF      | F value    | Pr(>F)        |
|------------------------------------------------|------------|------------|-------|------------|------------|---------------|
| <b>ANOVA table saturated LME model</b>         |            |            |       |            |            |               |
| follow-up                                      | 3527.91238 | 1763.95619 | 2     | 414.48214  | 217.480583 | 2.6167E-65*** |
| age at treatment                               | 445.422897 | 111.355724 | 4     | 278.929078 | 13.7292003 | 3.1163E-10*** |
| pretreatment                                   | 20.3464646 | 20.3464646 | 1     | 280.872958 | 2.50854359 | 0.11435581    |
| SMN2 copy number                               | 285.357944 | 285.357944 | 1     | 286.953502 | 35.1821732 | 8.6212E-09*** |
| presymptomatic diagnosis                       | 200.937091 | 200.937091 | 1     | 292.669598 | 24.7738102 | 1.1023E-06*** |
| follow-up: age at treatment                    | 1271.14557 | 158.893196 | 8     | 409.314095 | 19.5901606 | 4.9896E-25*** |
| follow-up: pretreatment                        | 40.0636104 | 20.0318052 | 2     | 411.305106 | 2.4697488  | 0.08586007    |
| follow-up: SMN2 copy number                    | 137.134984 | 68.5674922 | 2     | 414.366584 | 8.45378036 | 0.00025206*** |
| follow-up: presymptomatic diagnosis            | 283.04296  | 141.52148  | 2     | 413.685009 | 17.4483778 | 5.3085E-08*** |
| <b>ANOVA table backwards reduced LME model</b> |            |            |       |            |            |               |
| follow-up                                      | 3826.15207 | 1913.07604 | 2     | 416.759213 | 234.103195 | 7.1005E-69*** |
| age at treatment                               | 794.903055 | 198.725764 | 4     | 279.481692 | 24.3180801 | 2.7804E-17*** |
| SMN2 copy number                               | 262.095237 | 262.095237 | 1     | 284.090772 | 32.0726052 | 3.6353E-08*** |
| presymptomatic diagnosis                       | 233.233867 | 233.233867 | 1     | 293.881706 | 28.5408382 | 1.8416E-07*** |
| follow-up: age at treatment                    | 1623.19604 | 202.899505 | 8     | 410.810849 | 24.828821  | 3.4742E-31*** |
| follow-up: SMN2 copy number                    | 104.574869 | 52.2874347 | 2     | 414.626291 | 6.39841558 | 0.00183325**  |
| follow-up: presymptomatic diagnosis            | 333.750016 | 166.875008 | 2     | 415.765423 | 20.4205017 | 3.4713E-09*** |

**Supplemental Table 8: Linear mixed model of HINE scores using Type III analysis of variance table with Satterthwaite's method.**
